# Supplementary material
Source: PubMed Central journal article supplement (PMC9662612)
Supplement: NIHMS1842485-supplement-3.pdf [file NIHMS1842485-supplement-3.pdf]

# CONFLICT OF INTEREST STATEMENT

## *The Journal of Arthroplasty*

(Adopted from the American Academy of Orthopaedic Surgeons disclosure statement)

The following form **must be filled out completely and submitted by each author (example, 6 authors, 6 forms). If no discloser is required, please write/type "none" at the end of each sentence.**

- **Measurement Error and Misclassification in Orthopedics: when study subjects are categorized in the wrong exposure or outcome groups Orthopedics (Zaniletti et al.)**
- **P-values and Power in Orthopedic Research: Myths and Reality (Zaniletti et al.)**
- **Avoiding Systematic Bias in Orthopedics Research through Informed Variable Selection: A Discussion of Confounders, Mediators, and Colliders (Devick et al.)**
- **Study Types in Orthopedics Research: Is my study design appropriate for the research question? (Zaniletti et al.)**

Manuscript Title

1. Royalties from a company or supplier (The following conflicts were disclosed) **none**
2. Speakers bureau/paid presentations for a company or supplier (The following conflicts were disclosed) **none**
- 3A. Paid employee for a company or supplier (The following conflicts were disclosed) **none**
- 3B. Paid consultant for a company or supplier (The following conflicts were disclosed) **none**
- 3C. Unpaid consultants for a company or supplier (The following conflicts were disclosed) **none**
4. Stock or stock options in a company or supplier (The following conflicts were disclosed) **none**
5. Research support from a company or supplier as a Principal Investigator (The following conflicts were disclosed) **none**
6. Other financial or material support from a company or supplier (The following conflicts were disclosed) **none**
7. Royalties, financial or material support from publishers (The following conflicts were disclosed) **none**
8. Medical/Orthopaedic publications editorial/governing board (The following conflicts were disclosed) **none**
9. Board member/committee appointments for a society (The following conflicts were disclosed) **none**

**Each author must sign AND print or type his/her name, date and submit a separate form**

In addition, one BLINDED Conflict of Interest form (no author names used) should be submitted per manuscript with all author disclosures.

Dirk R. Larson



12.6.2021

Author Name (Print or Type)

Author Signature

Date
