# Supplementary material
Source: PubMed Central journal article supplement (PMC9662612)
Supplement: NIHMS1842485-supplement-4.pdf [file NIHMS1842485-supplement-4.pdf]

# CONFLICT OF INTEREST STATEMENT

## *The Journal of Arthroplasty*

(Adopted from the American Academy of Orthopaedic Surgeons disclosure statement)

The following form **must be filled out completely and submitted by each author (example, 6 authors, 6 forms). If no discloser is required, please write/type "none" at the end of each sentence.**

- **Measurement Error and Misclassification in Orthopedics: when study subjects are categorized in the wrong exposure or outcome groups Orthopedics (Zaniletti et al.)**
- **P-values and Power in Orthopedic Research: Myths and Reality (Zaniletti et al.)**
- **Avoiding Systematic Bias in Orthopedics Research through Informed Variable Selection: A Discussion of Confounders, Mediators, and Colliders (Devick et al.)**
- **Study Types in Orthopedics Research: Is my study design appropriate for the research question? (Zaniletti et al.)**

Manuscript Title

1. Royalties from a company or supplier (The following conflicts were disclosed) *Zimmer, Biomet*
2. Speakers bureau/paid presentations for a company or supplier (The following conflicts were disclosed) *none*
- 3A. Paid employee for a company or supplier (The following conflicts were disclosed) *none*
- 3B. Paid consultant for a company or supplier (The following conflicts were disclosed) *Zimmer, Biomet*
- 3C. Unpaid consultants for a company or supplier (The following conflicts were disclosed) *none*
4. Stock or stock options in a company or supplier (The following conflicts were disclosed)  
*Acuitive Technologies, Ketai Medical Devices*
5. Research support from a company or supplier as a Principal Investigator (The following conflicts were disclosed)  
*Corin*
6. Other financial or material support from a company or supplier (The following conflicts were disclosed) *none*
7. Royalties, financial or material support from publishers (The following conflicts were disclosed) *none*
8. Medical/Orthopaedic publications editorial/governing board (The following conflicts were disclosed) *none*
9. Board member/committee appointments for a society (The following conflicts were disclosed)  
*American Joint Replacement Registry, Orthopaedic Research and Education Foundation*

### **Each author must sign AND print or type his/her name, date and submit a separate form**

In addition, one BLINDED Conflict of Interest form (no author names used) should be submitted per manuscript with all author disclosures.

David G. Lewallen

Author Name (Print or Type)

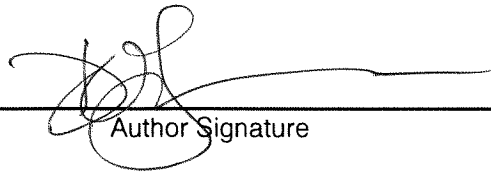

Author Signature

12/6/2021

Date
